# Supplementary material
Source: PubMed Central journal article supplement (PMC7669663)

Fig.8b

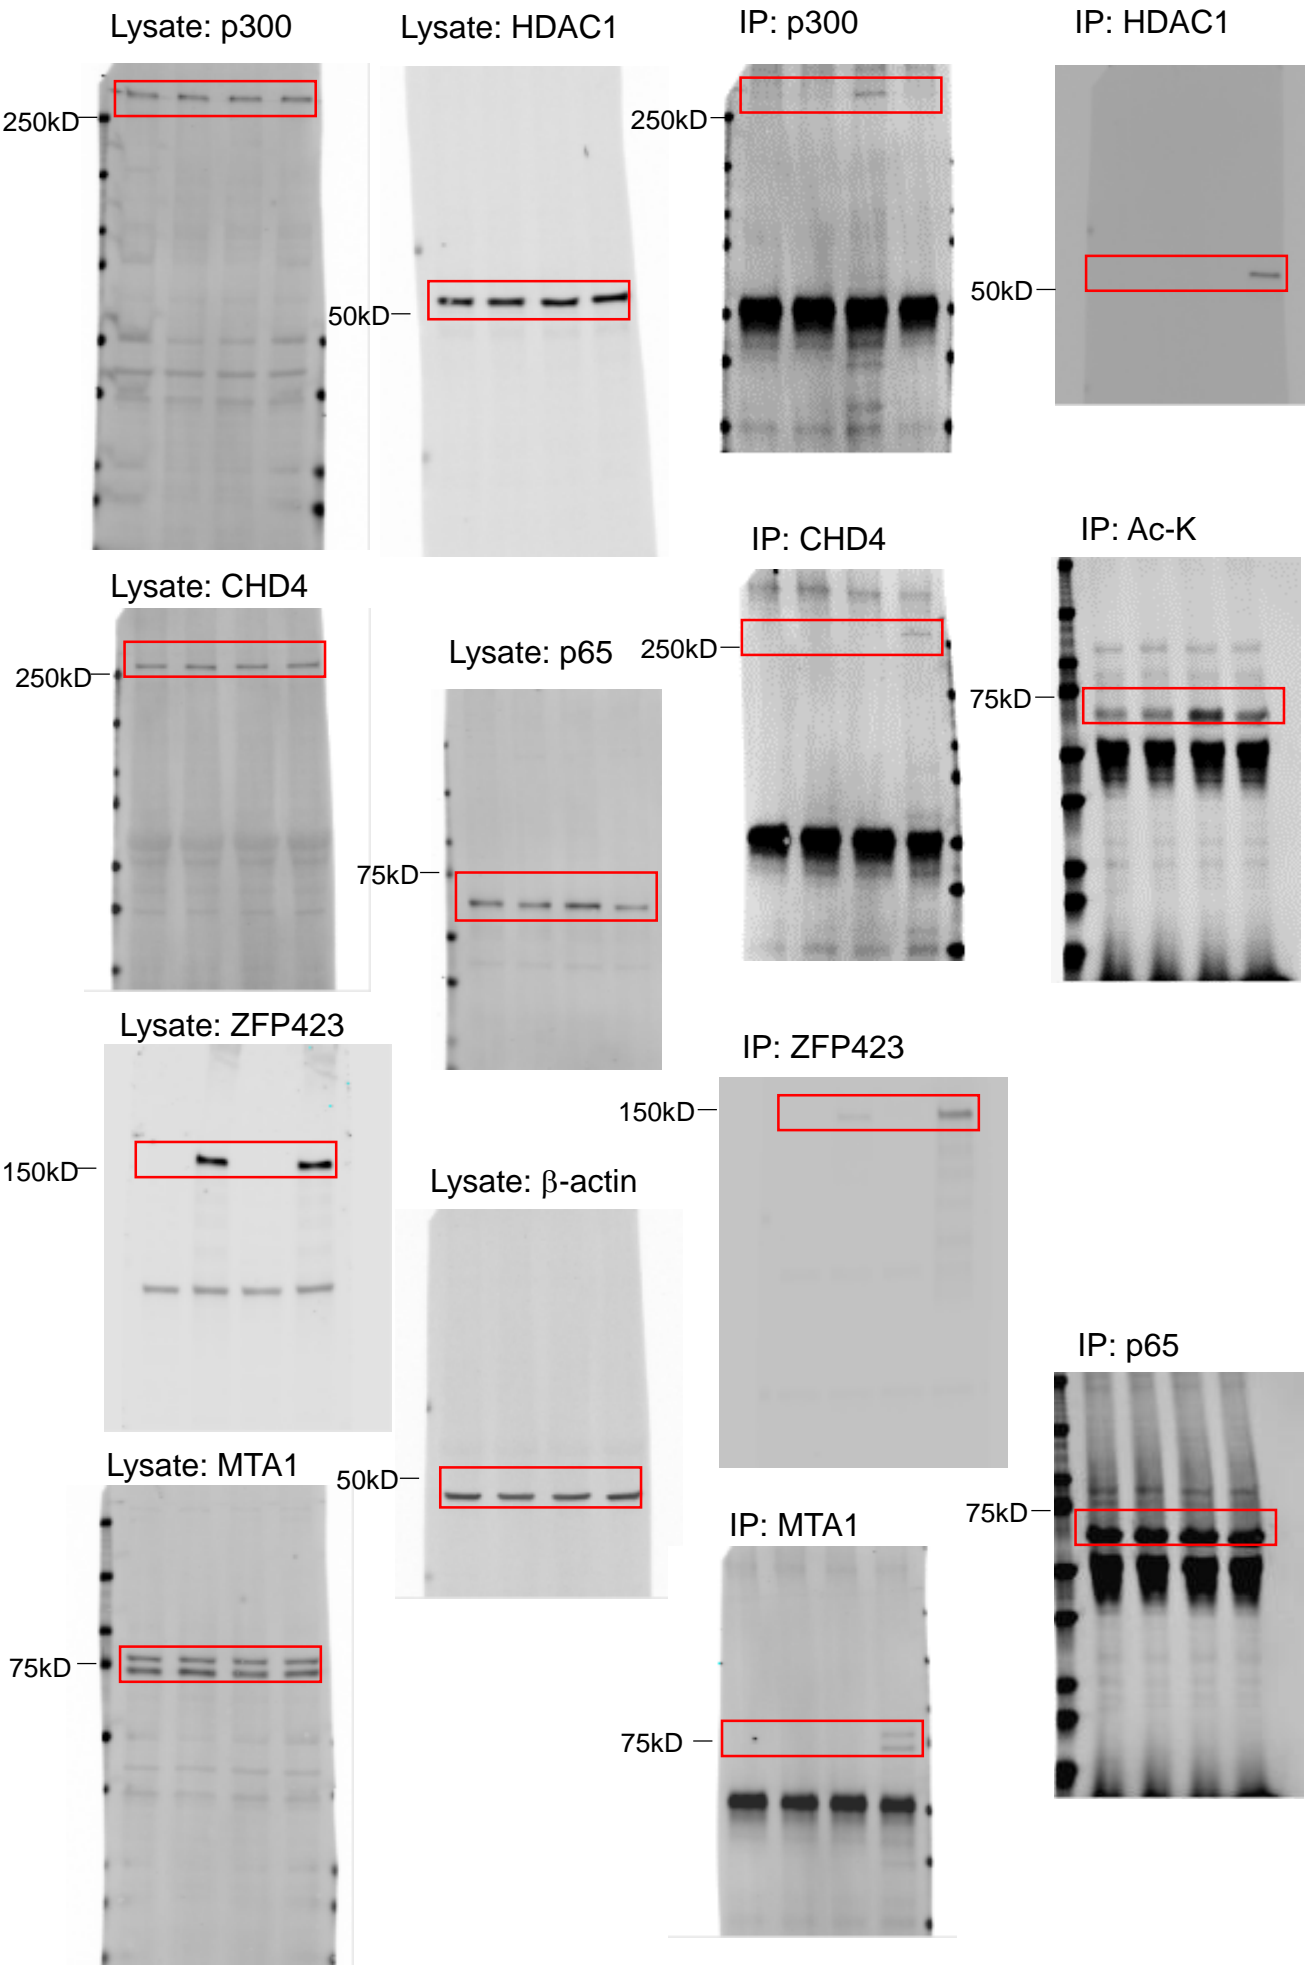

Uncropped scans of western blots for Figure 8

Fig.8c

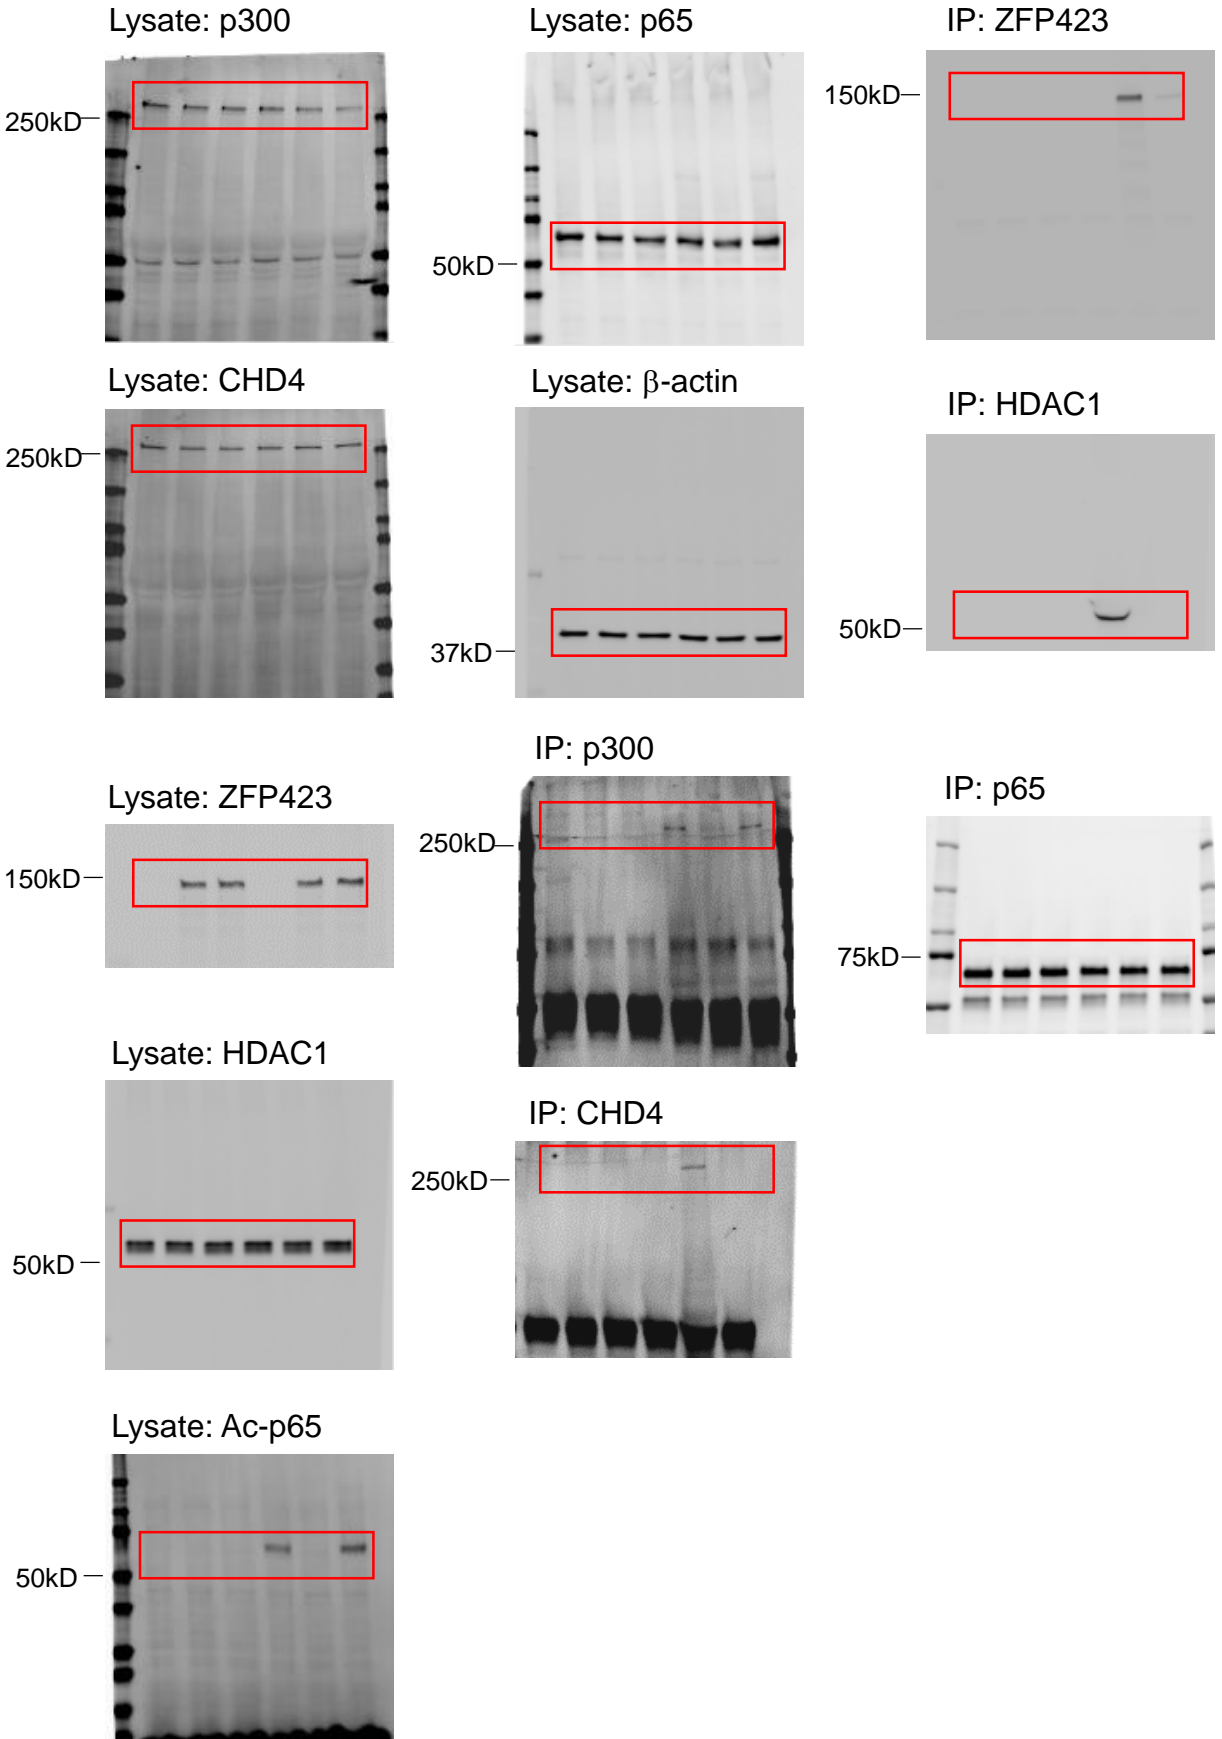

Uncropped scans of western blots for Figure 8

Fig.8d

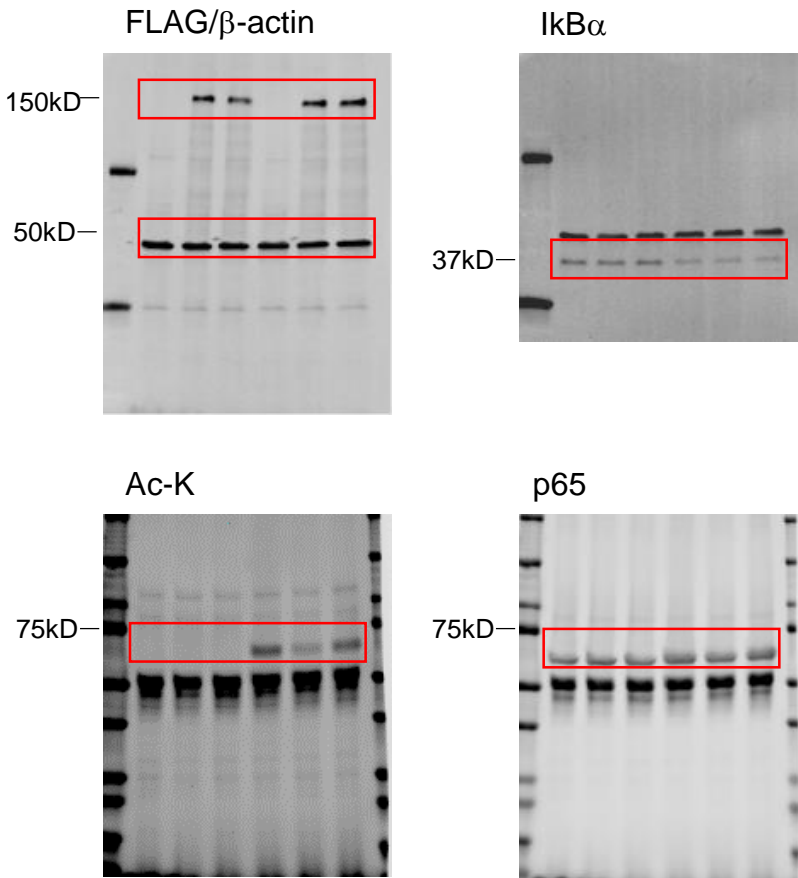

Supplement: NIHMS1629890-supplement-1629890_Statistical__SourceData_Fig8.pdf [file NIHMS1629890-supplement-1629890_Statistical__SourceData_Fig8.pdf]
