# Supplementary material
Source: PubMed Central journal article supplement (PMC7669663)

Extended Data Figure 5a

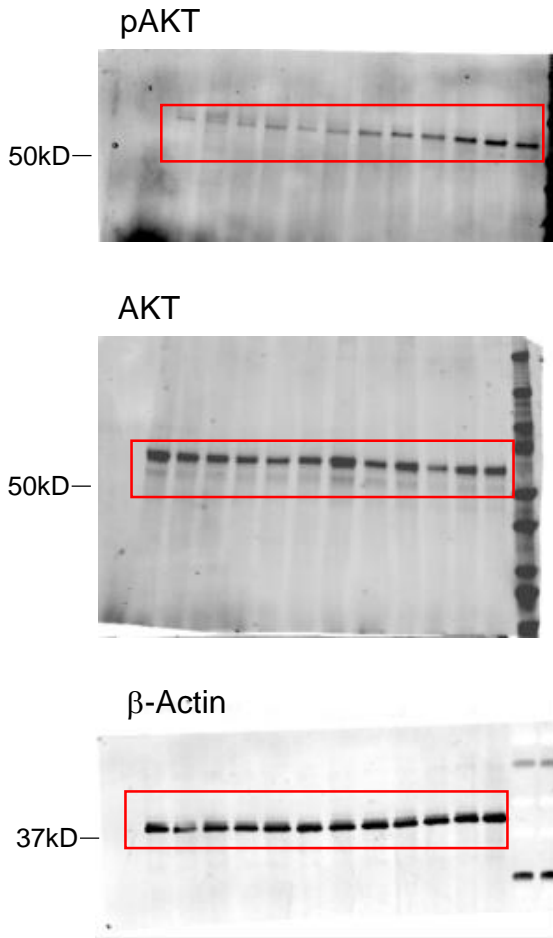

Uncropped scans of western blots for Extended Data Figure 5

Supplement: NIHMS1629890-supplement-1629890_Statistical__SourceData_ExtData_Fig5.pdf [file NIHMS1629890-supplement-1629890_Statistical__SourceData_ExtData_Fig5.pdf]

Extended Data Figure 8a

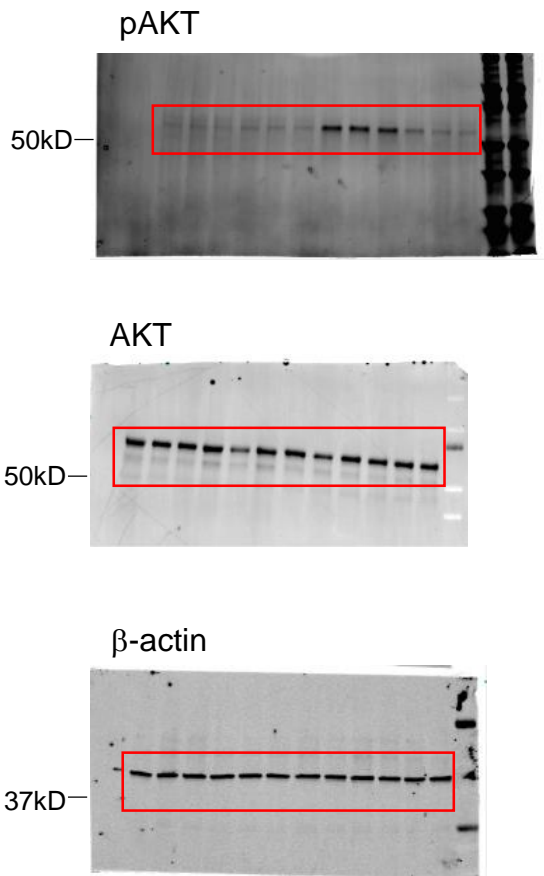

Uncropped scans of western blots for Extended Data Figure 8

Supplement: NIHMS1629890-supplement-1629890_Statistical__SourceData_ExtData_Fig8.pdf [file NIHMS1629890-supplement-1629890_Statistical__SourceData_ExtData_Fig8.pdf]

Fig.7b

I $\kappa$ B $\alpha$

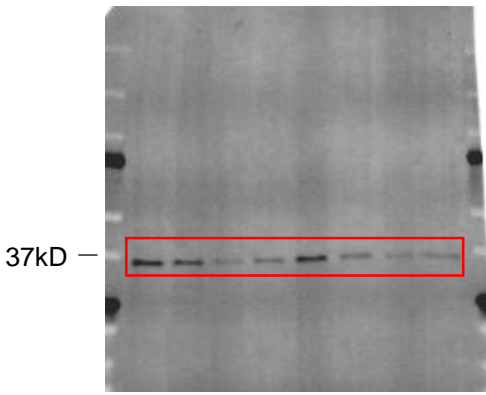

$\alpha$ -tubulin

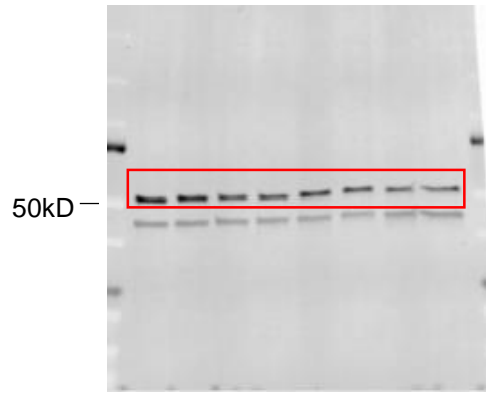

Ac-K

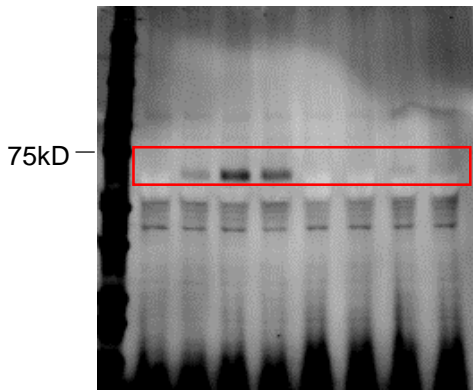

p65

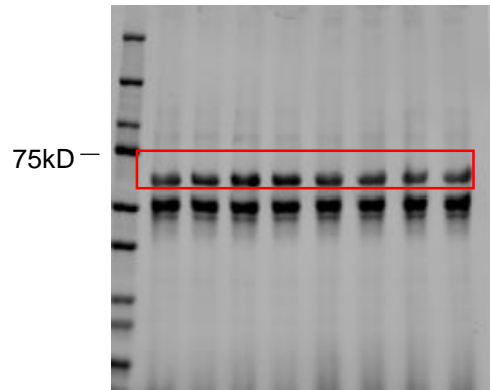

Uncropped scans of western blots for Figure 7

Supplement: NIHMS1629890-supplement-1629890_Statistical__SourceData_Fig7.pdf [file NIHMS1629890-supplement-1629890_Statistical__SourceData_Fig7.pdf]
